# Supplementary material for: Interleukin-17 Receptor A1 Gene Knockout Causes Weight Loss and Reduction of Intestinal Metabolism-Related Genes in The Japanese Medaka, Oryzias Latipes
Source: Research Square preprint supplement (doi:10.21203/rs.3.rs-114142/v1), 2020-12-07
Supplement: Supplementary file 4 [file 6507557b071706b7c98a310d.xlsx]

## Sheet: Table 2
Table 2. Comparison of down-regulated differentially expressed genes (DEGs) in IL-17A/F1-KO and IL-17RA1-KO medaka intestines
Gene ID	Gene symbol	Product name		Comparing to WT (log2_Fold Changes)
				AF1-KO 1	RA-KO (An) 2	RA-KO (Pos) 3
Down-regulated genes in common between A/F1-KO, RA-KO (An), and RA-KO (Pos)
ENSORLG00000008560	pdia2	Protein disulfide isomerase family A, member 2		-1.894	-1.231	-1.62
ENSORLG00000020002	cyp51	Cytochrome P450 family 51 subfamily A polypeptide 1		-1.69	-1.499	-1.446
Down-regulated genes in common between A/F1-KO and RA-KO (An)
ENSORLG00000017313	hmgcra	3-hydroxy-3-methylglutaryl-CoA reductase		-4.273	-1.223
ENSORLG00000016356	pglyrp6	Peptidoglycan recognition protein 6		-3.034	-1.059
ENSORLG00000019810	cpa1	Carboxypeptidase A1		-2.611	-0.956
ENSORLG00000020058	endou	Poly(U)-specific endoribonuclease		-2.597	-1.486
ENSORLG00000016693	dnase1	DNase I		-2.159	-1.571
ENSORLG00000013259	cicb	Capicua homolog b		-2.151	-1.497
ENSORLG00000007210	tmprss13a	Transmembrane serine protease 13a		-2.054	-2.116
ENSORLG00000017611	cyp8b2	Cytochrome P450, family 8, subfamily B, polypeptide 2		-2.009	-1.501
Down-regulated genes in common between A/F1-KO and RA-KO (Pos)
ENSORLG00000010663	ela3l	Elastase 3 like		-2.986		-1.66
ENSORLG00000014439	cel (1 of many)	Bile salt-activated lipase		-2.612		-1.314
ENSORLG00000018515	si:dkey-266f7.9	Si:dkey-266f7.9		-2.456		-1.157
ENSORLG00000000965	cpa4	Carboxypeptidase A4		-2.406		-1.41
ENSORLG00000004534	ela2	Elastase 2		-2.274		-1.535
ENSORLG00000004586	ela2l	Elastase 2-like		-1.972		-1.142
ENSORLG00000014032	nudc	Nuclear migration protein nudC		-1.713		-1.658
1 Significantly down-regulated DEGs in IL-17A/F1-KO medaka (whole intestine)
2 Significantly down-regulated DEGs in IL-17RA1-KO medaka (anterior intestine)
3 Significantly down-regulated DEGs in IL-17RA1-KO medaka (posterior intestine)
