# Supplementary material for: Interleukin-17 Receptor A1 Gene Knockout Causes Weight Loss and Reduction of Intestinal Metabolism-Related Genes in The Japanese Medaka, Oryzias Latipes
Source: Research Square preprint supplement (doi:10.21203/rs.3.rs-114142/v1), 2020-12-07
Supplement: Supplementary file 5 [file 6745a2fb35e58f3c187807f1.xlsx]

## Sheet: Table 1
Table 1. Differentially expressed genes (DEG) down-regulated in the anterior intestine of IL-17RA1-KO medaka and their interactions with IL-17RA, based on String App software
Gene ID	Gene name	Gene symbol	FPKM 1		p value	Fold- decrease 2
			WT	IL-17RA1-KO
ENSORLG00000008141	Melatonin receptor 1A	mtnr1aa	0.5291	0.0122	0.0203	0.023
ENSORLG00000023466	Interleukin 17C	il17c	1.216	0.0611	0.016	0.0503
ENSORLG00000003196	Squalene epoxidase	sqlea	2.796	0.4495	0.0109	0.1608
ENSORLG00000026984	Heat shock protein family A (Hsp70), member 2	hspa2	1.8446	0.3331	0.0333	0.1806
ENSORLG00000007442	Homogentisate 1,2-dioxygenase	hgd	1.1033	0.2177	0.012	0.1973
ENSORLG00000015759	Ubiquitin-protein ligase E3A	ube3a	1.7653	0.4081	0.0292	0.2312
ENSORLG00000016652	Chemokine (C motif) receptor 1a, duplicate 1	xcr1a.1	4.0532	1.0368	0.047	0.2558
ENSORLG00000002190	3 beta-hydroxysteroid dehydrogenase type 7-like	hsd3b7 (one of many)	27.8564	7.5955	0.005	0.2727
ENSORLG00000005554	Angiotensinogen	agt	3.3784	0.9213	0.0317	0.2727
ENSORLG00000012993	4-hydroxyphenylpyruvate dioxygenase-like	hpdb	6.4362	1.8856	0.0362	0.293
ENSORLG00000009351	Mevalonate diphosphate decarboxylase	mvda	8.4053	2.5234	0.0103	0.3002
ENSORLG00000009486	Nuclear receptor ROR-alpha	rorc	2.039	0.621	0.0446	0.3045
ENSORLG00000010025	PR domain containing 1b, with ZNF domain	prdm1b	13.487	4.2061	0.0085	0.3119
ENSORLG00000014448	Ribonuclease ZC3H12A	zc3h12a	9.9674	3.1314	0.0077	0.3142
ENSORLG00000003479	Retinol dehydrogenase 7-like	dhrs9 (one of many)	15.0659	4.7656	0.0139	0.3163
ENSORLG00000013226	Acetyl-CoA acetyltransferase 2	acat2	23.153	7.3427	0.0085	0.3171
ENSORLG00000002010	Glucokinase	gck	3.214	1.0907	0.0241	0.3394
ENSORLG00000005076	RAS and EF-hand domain-containing	rasef	5.0748	1.8392	0.0195	0.3624
ENSORLG00000020002	Cytochrome P450, family 51	cyp51	277.787	102.511	0.0076	0.369
ENSORLG00000023013	Tachykinin precursor 1	tac1	3.2667	1.2556	0.0355	0.3844
ENSORLG00000017362	Farnesyl-diphosphate farnesyltransferase 1	fdft1	13.9791	5.3888	0.0126	0.3855
ENSORLG00000012898	3-hydroxy-3-methylglutaryl-CoA synthase 1	hmgcs1	5.9028	2.2869	0.0203	0.3874
ENSORLG00000001448	Heat shock 70 kDa protein 4-like	hspa4a	7.0157	2.8314	0.0285	0.4036
ENSORLG00000013386	Transmembrane p24 trafficking protein 6	tmed6	56.5513	23.2489	0.0189	0.4111
ENSORLG00000022324	DNAJ homolog subfamily C, member 5	dnajc5ab	24.5142	10.498	0.0166	0.4282
ENSORLG00000010353	Aldose reductase	akr1b1.1 (one of many)	99.8516	43.7327	0.0181	0.438
ENSORLG00000008560	Protein disulfide-isomerase	pdia2	246.205	109.395	0.0153	0.4443
ENSORLG00000017313	3-hydroxy-3-methylglutaryl-coenzyme A reductase	hmgcra	12.3052	5.4985	0.0242	0.4468
ENSORLG00000007166	TNF receptor associated factor 2	traf2b	15.6801	7.0424	0.0214	0.4491
ENSORLG00000011656	Kininogen-1	kng1	11.3471	5.1716	0.0488	0.4558
ENSORLG00000006886	Heat shock protein family A (Hsp70), member 5	hspa5	92.3296	43.1643	0.0205	0.4675
ENSORLG00000008898	BRISC and BRCA1 A complex member 1	babam1	6.2851	2.9557	0.0463	0.4703
ENSORLG00000017687	NFKB inhibitor alpha	nfkbiab	136.741	65.0318	0.0245	0.4756
ENSORLG00000005556	Baculoviral IAP repeat-containing protein 2	birc2	13.2523	6.485	0.0322	0.4894
ENSORLG00000007453	DNAJ homolog subfamily A member 4	dnaja4	8.6528	4.3025	0.0382	0.4972
ENSORLG00000020572	Sequestosome 1	sqstm1	107.988	54.4971	0.0307	0.5047
ENSORLG00000028270	Mesencephalic astrocyte derived neurotrophic factor	manf	10.6284	5.3821	0.0408	0.5064
ENSORLG00000001602	24-dehydrocholesterol reductase	dhcr24	16.5392	8.4677	0.0442	0.512
ENSORLG00000001131	Interferon regulatory factor 1	irf1b	572.819	294.31	0.0308	0.5138
ENSORLG00000011887	Glucosamine-phosphate N-acetyltransferase 1	gnpnat1	36.8613	19.0665	0.0449	0.5173
ENSORLG00000018711	Glucose-6-phosphatase catalytic subunit	g6pca.2	73.9836	38.5079	0.0345	0.5205
ENSORLG00000006618	Antigen peptide transporter 2-like	abcb3	61.6532	32.2189	0.0368	0.5226
ENSORLG00000004789	5-aminolevulinate synthase 1	alas1	71.7004	37.5533	0.0357	0.5238
ENSORLG00000011822	ATP binding cassette subfamily F, member 2	abcf2a	34.697	18.386	0.0435	0.5299
ENSORLG00000019810	Carboxypeptidase A1	cpa1 (one of many)	1383.35	743.946	0.0374	0.5378
ENSORLG00000008139	EBP cholestenol delta-isomerase	ebp	139.218	75.5733	0.0473	0.5428
ENSORLG00000005536	Serine hydroxymethyltransferase 2	shmt2	26.3162	14.2869	0.0471	0.5429
1 Fragment per kilobase of exon length per million reads
2 Fold-decrease in the anterior intestine of IL-17RA1-KO, compared to that in WT medaka

## Sheet: Table 2
Table 2. Comparison of down-regulated differentially expressed genes (DEGs) in IL-17A/F1-KO and IL-17RA1-KO medaka intestines
Gene ID	Gene symbol	Product name		Comparing to WT (log2_Fold Changes)
				AF1-KO 1	RA-KO (An) 2	RA-KO (Pos) 3
Down-regulated genes in common between A/F1-KO, RA-KO (An), and RA-KO (Pos)
ENSORLG00000008560	pdia2	Protein disulfide isomerase family A, member 2		-1.894	-1.231	-1.62
ENSORLG00000020002	cyp51	Cytochrome P450 family 51 subfamily A polypeptide 1		-1.69	-1.499	-1.446
Down-regulated genes in common between A/F1-KO and RA-KO (An)
ENSORLG00000017313	hmgcra	3-hydroxy-3-methylglutaryl-CoA reductase		-4.273	-1.223
ENSORLG00000016356	pglyrp6	Peptidoglycan recognition protein 6		-3.034	-1.059
ENSORLG00000019810	cpa1	Carboxypeptidase A1		-2.611	-0.956
ENSORLG00000020058	endou	Poly(U)-specific endoribonuclease		-2.597	-1.486
ENSORLG00000016693	dnase1	DNase I		-2.159	-1.571
ENSORLG00000013259	cicb	Capicua homolog b		-2.151	-1.497
ENSORLG00000007210	tmprss13a	Transmembrane serine protease 13a		-2.054	-2.116
ENSORLG00000017611	cyp8b2	Cytochrome P450, family 8, subfamily B, polypeptide 2		-2.009	-1.501
Down-regulated genes in common between A/F1-KO and RA-KO (Pos)
ENSORLG00000010663	ela3l	Elastase 3 like		-2.986		-1.66
ENSORLG00000014439	cel (1 of many)	Bile salt-activated lipase		-2.612		-1.314
ENSORLG00000018515	si:dkey-266f7.9	Si:dkey-266f7.9		-2.456		-1.157
ENSORLG00000000965	cpa4	Carboxypeptidase A4		-2.406		-1.41
ENSORLG00000004534	ela2	Elastase 2		-2.274		-1.535
ENSORLG00000004586	ela2l	Elastase 2-like		-1.972		-1.142
ENSORLG00000014032	nudc	Nuclear migration protein nudC		-1.713		-1.658
1 Significantly down-regulated DEGs in IL-17A/F1-KO medaka (whole intestine)
2 Significantly down-regulated DEGs in IL-17RA1-KO medaka (anterior intestine)
3 Significantly down-regulated DEGs in IL-17RA1-KO medaka (posterior intestine)
