# Supplementary material for: Interleukin-17 Receptor A1 Gene Knockout Causes Weight Loss and Reduction of Intestinal Metabolism-Related Genes in The Japanese Medaka, Oryzias Latipes
Source: Research Square preprint supplement (doi:10.21203/rs.3.rs-114142/v1), 2020-12-07
Supplement: Supplementary file 6 [file ac025bcb02a27aaf59f65ea2.xlsx]

## Sheet: Table S1
Table S1. crRNA and Primer sequences used in this study.
Sequence name	Nucleotide sequence (5'-3')	Purpose
crRNA1-1	GAGCGAGCGGGUCCUGGUUC	Genome Editing
crRNA1-2	UAUGACCGCGAAGCGACAUG	Genome Editing
crRNA7-1	UGCUGAUGUUCGGCUGCCAC	Genome Editing
crRNA7-2	UCUCUGACCGUCAGCUUCAG	Genome Editing
IL-17RAF1	CACATTCAACGCGCTCGAGA	HMA
IL-17RAF2	TCCCTGAAATGGAGAACACC	HMA
IL-17RAR1	GTGACATCCAGCAGTTCCAT	HMA
Chr.23IL-17RA-ORF-F	ATGAGGACTTTCCTAACCATCC	ORF amplification of WT's IL-17RA1
Chr.23IL-17RA-ORF-R	TCACGACGCAGTCAAGCTGTTG	ORF amplification of WT's IL-17RA1
IL-17RAmu-ORF-F2	ATGCTCTCCAAGTGGCCGAG	ORF amplification of mutated IL-17RA1
IL-17RAmu-ORF-R2	TCACGACGCAGTCAAGCTGTT	ORF amplification of mutated IL-17RA1
Chr. 23IL-17RA-exF2	CTTTGTGGAGCGGTAGTTCC	qPCR
Chr. 23IL-17RA-exR2	CTCCAGACGCTCCTTTTCTG	qPCR
mvda-exF1	TGTCCTTGTGGCTAGTGCTG	qPCR
mvda-exR1	GACTCTGCCCGATGCTTTAG	qPCR
acat2-exF1	CAGATGGTGTGTGGTTCTGG	qPCR
acat2-exR1	ATCTTCACGCCTGCTCTCAT	qPCR
hmgcs1-exF1	TGATGCTCAACGACTTCCTG	qPCR
hmgcs1-exR1	TTTCCTCTGGCTTCACGTCT	qPCR
hmgcra-exF1	AAGGTGGTCCAGGAGGTTCT	qPCR
hmgcra-exR1	GTAGATGGCAGCCACCAGAT	qPCR
il17c-exF1	CCTGGAAATACACGGAAGTCA	qPCR
il17c-exR1	AGGGGCTTGGAGTTGAAGTT	qPCR
rorc-exF1	TGCACAAGCTGTACCAGAGG	qPCR
rorc-exR1	TACCGCTGACTGAACCAGTG	qPCR
il17af1-exF1	TTCAGCAACCAGCTTCTGC	qPCR
il17af1-exR1	GGTCACCATCATCCTCATCA	qPCR
stat3-exF1	TCACCACACTGGCTGAGAAG	qPCR
stat3-exR1	AGCCCATGATGTATCCTTCG	qPCR
apoa1b-exF1	CAGGTGAAGCAGGGTTTGAT	qPCR
apoa1b-exR1	CAGAAATGGTGGTGACAACG	qPCR
pla2g12b-exF1	GCTATGACCAAGTGCTGCAA	qPCR
pla2g12b-exR1	TGTACAGAGCGTCTGCCATC	qPCR
mogat2-exF1	TACATCCTGGGCTTTCATCC	qPCR
mogat2-exR1	CTGCACACATGGCGTAGTCT	qPCR
ctsbb-exF1	CTGTCCCACACTCAAGCAGA	qPCR
ctsbb-exR1	AAGCAGCAGAAGGAAAACCA	qPCR
neu1-exF1	GTGGTGGTGGACGAAGAAGT	qPCR
neu1-exR1	CGAGCTCAATGGAGAGGTTC	qPCR
man2b1-exF1	CCCTGACAGTGCAGCAGATA	qPCR
man2b1-exR1	TGTCAGGAGATGGACAGCAG	qPCR
β-actin-exF1	CCACCATGTACCCTGGAATC	qPCR
β-actin-exR1	GCTGGAAGGTGGACAGAGAG	qPCR

## Sheet: Table S2
Table S2. List of top 50 genes with significantly higher expression in WT anterior intestine compared to posterior intestine.
Gene_ID	Gene name	Gene Symbol	FPKM*1		p_value	Fold increases*2
			Anterior/WT	Posterior/WT
ENSORLG00000007755	GLIS family zinc finger 3	glis3	0.653783	0	0.016566	N/A
ENSORLG00000009829	Complement C8 beta chain	c8b	0.492892	0	0.031607	N/A
ENSORLG00000024779	Solute carrier family 35 member D3	slc35d3	0.321644	0	0.039025	N/A
ENSORLG00000012756	Calcium voltage-gated channel auxiliary subunit gamma 3	cacng3b	4.80769	0.045551	0.009076	105.545
ENSORLG00000000064	Rho-related GTP-binding protein RhoU	si:ch211-133l11.10	2.2199	0.034217	0.019288	64.8763
ENSORLG00000010752	C->U-editing enzyme APOBEC-2	apobec2	0.847848	0.013898	0.021198	61.0031
ENSORLG00000024637	Prostaglandin F receptor	ptgfr	2.22413	0.038282	0.022838	58.0982
ENSORLG00000006353	Fatty acid desaturase 2	fads2 (1 of many)	3.3716	0.081094	0.00766	41.5765
ENSORLG00000019113	Synaptotagmin 14	syt14a	3.18874	0.079672	0.010874	40.0232
ENSORLG00000004922	Ethanolamine-phosphate phospho-lyase	etnppl	3.1788	0.092583	0.004795	34.3344
ENSORLG00000006187	Vitellogenin II	vit-6	1.25974	0.058377	0.014287	21.5793
ENSORLG00000027981	Apolipoprotein Eb	apoea	8585.84	450.128	0.005669	19.0742
ENSORLG00000016142	Ankyrin repeat and EF-hand domain containing 1	ankef1a	0.935558	0.049295	0.023324	18.9787
ENSORLG00000017640	Solute carrier family 15 member 1	slc15a1a	122.04	6.47565	0.00594	18.8459
ENSORLG00000022823	Sodium-dependent neutral amino acid transporter B(0)AT1	slc6a19 (1 of many)	4.75194	0.271305	0.008755	17.5152
ENSORLG00000017374	GATA binding protein 4	gata4	52.0253	3.14525	0.00788	16.5409
ENSORLG00000006357	Fatty acid desaturase 2	fads2 (1 of many)	24.1857	1.49008	0.007918	16.2312
ENSORLG00000002980	Phosphoethanolamine N-methyltransferase	pmt	65.8878	4.26296	0.00757	15.4559
ENSORLG00000011725	Phosphatase and actin regulator 3	phactr3b	11.3762	0.749912	0.010681	15.1701
ENSORLG00000007815	Netrin receptor UNC5C	unc5c	1.12779	0.076471	0.017489	14.748
ENSORLG00000003870	Monocarboxylate transporter 12-B-like	slc16a12a	13.9997	0.989398	0.012428	14.1497
ENSORLG00000004027	Alpha-N-acetylgalactosaminide alpha-2,6-sialyltransferase 5	st6galnac5b	3.69238	0.274829	0.02827	13.4352
ENSORLG00000011814	Thiamine transporter 2-like	slc19a3a	27.7826	2.30922	0.011914	12.0312
ENSORLG00000002121	Malic enzyme 1	me1	125.01	10.5394	0.010791	11.8612
ENSORLG00000009477	Alkaline phosphatase	alp3	15.4653	1.30591	0.011808	11.8426
ENSORLG00000015744	Apolipoprotein A-I	apoa1b	15041.7	1319.02	0.010975	11.4037
ENSORLG00000009193	Apolipoprotein A-IV	apoa4a	5928.09	542.279	0.011591	10.9318
ENSORLG00000025647	Alkaline phosphatase	alpi.1	6.14519	0.565984	0.01551	10.8575
ENSORLG00000002620	Ankyrin repeat and SOCS box protein 16	asb16	2.63495	0.25279	0.026138	10.4235
ENSORLG00000010369	Vasorin	vasna	2.08176	0.204753	0.03799	10.1672
ENSORLG00000004492	PR/SET domain 16	si:ch211-263k4.2	5.06848	0.51757	0.015939	9.79284
ENSORLG00000003390	Cysteine dioxygenase type 1	cdo1	1348.55	138.07	0.013512	9.76716
ENSORLG00000003115	Phosphoethanolamine/phosphocholine phosphatase 1	phospho1	16.5748	1.72285	0.02226	9.62056
ENSORLG00000019522	Fatty acid binding protein 2	gucy1b1	904.988	94.5303	0.01377	9.57352
ENSORLG00000000838	Fatty acid hydroxylase domain containing 2	faxdc2	174.702	18.2705	0.013947	9.56199
ENSORLG00000004048	Amine oxidase copper containing 1	aoc1	112.008	12.2209	0.014769	9.16532
ENSORLG00000001556	Glycine decarboxylase	gldc	52.8732	5.84183	0.015317	9.0508
ENSORLG00000027036	Nicotinate-nucleotide pyrophosphorylase	qprt	4.90837	0.544889	0.02059	9.00801
ENSORLG00000011461	Lysoplasmalogenase	tmem86b	112.411	12.7468	0.015882	8.81881
ENSORLG00000011713	Metallophosphoesterase domain-containing protein 1	mpped1	3.98648	0.46433	0.023314	8.58544
ENSORLG00000007987	Cholesterol 25-hydroxylase-like protein 1, member 1	ch25hl1.1	61.097	7.27446	0.018683	8.39883
ENSORLG00000011403	Sodium- and chloride-dependent GABA transporter ine	si:ch211-283g2.1	7.48571	0.89201	0.020658	8.39196
ENSORLG00000017885	Calsequestrin-2	casq2	18.9254	2.25666	0.019194	8.38649
ENSORLG00000003516	CaM kinase-like vesicle-associated protein	camkva	1.62199	0.196389	0.037955	8.25906
ENSORLG00000004121	SCO-spondin	scospondin	0.564595	0.067877	0.033838	8.31795
ENSORLG00000006998	Intestinal-type alkaline phosphatase 1	alpi.2	55.1951	6.87968	0.018209	8.02291
ENSORLG00000018506	Mitochondrial uncoupling protein 2	ucp1	745.753	94.7066	0.017872	7.87436
ENSORLG00000006858	WSC domain containing 2	wscd2	7.0447	0.919192	0.027045	7.66402
ENSORLG00000005805	G protein-coupled receptor 149	gpr149	0.832364	0.109615	0.040802	7.59354
ENSORLG00000028067	Group XIIB secretory phospholipase A2-like protein	pla2g12b (1 of many)	26.3952	3.57029	0.020539	7.39301
*1 Fragment per kilobase of exon length per million reads
*2 Fold increases of anterior intestine compared to posterior intestine in WT

## Sheet: Table S3
Table S3. List of top 50 genes with significantly higher expression in WT posterior intestine compared to anterior intestine.
Gene_ID	Gene name	Gene Symbol	FPKM*1		p_value	Fold increases*2
			Anterior/WT	Posterior/WT
ENSORLG00000007896	Homeobox C13	hoxc13a	0	56.9097	0.042601	N/A
ENSORLG00000013898	Sodium-dependent neutral amino acid transporter B(0)AT3	slc6a18	0.014883	45.7262	0.031928	3072.39
ENSORLG00000012622	Gastrotropin	fabp6	2.02067	3802.42	0.032418	1881.76
ENSORLG00000029159	Transmembrane and immunoglobulin domain containing 1	tmigd1	0.106334	197.455	0.033347	1856.93
ENSORLG00000007902	Homeobox protein Hox-C12a	hoxc12a	0.012779	19.6644	0.047384	1538.77
ENSORLG00000000412	Solute carrier family 12 member 3	slc12a3	0.190333	289.562	0.035663	1521.35
ENSORLG00000017347	Cathepsin B	ctsbb	0.219461	292.906	0.037311	1334.66
ENSORLG00000012785	Equisetin synthetase eqxS	si:dkey-61p9.11	0.034595	38.5617	0.041306	1114.66
ENSORLG00000005559	Novel gene	si:dkey-23i12.7	0	6.55448	0.019605	N/A
ENSORLG00000015795	PQ-loop repeat-containing protein 1	si:dkey-246g23.2	0	1.93767	0.020822	N/A
ENSORLG00000010475	Ring finger protein 32	rnf32	0	1.01096	0.034365	N/A
ENSORLG00000025010	Diacylglycerol kinase beta	dgkg	0	0.619658	0.039179	N/A
ENSORLG00000017540	Homeobox D10	hoxd9	0.005614	0.985636	0.006613	175.565
ENSORLG00000002209	E3 ubiquitin-protein ligase TRIM39	btr01	0.013523	2.34626	0.006734	173.499
ENSORLG00000003592	5-hydroxytryptamine receptor 7	htr7a	0	0.92148	0.045145	N/A
ENSORLG00000006424	Nerve growth factor-like	ngfb	0	2.09764	0.045145	N/A
ENSORLG00000019722	Calpain 9	capn9	0.042558	5.18629	0.004504	121.863
ENSORLG00000013074	Phosphoribosyl transferase domain containing 1	unm_sa821	0.035953	4.19571	0.01238	116.699
ENSORLG00000030349	Serine palmitoyltransferase small subunit B	sptssb	0.172073	18.6591	0.013849	108.437
ENSORLG00000009791	DEP domain containing 7	depdc7a	0.04966	3.56435	0.010677	71.775
ENSORLG00000012431	Transmembrane protein 182	tmem182a	0.013145	0.909533	0.027356	69.1932
ENSORLG00000004981	Homeobox protein Hox-A1a	hoxa1a	0.033067	1.99776	0.014159	60.415
ENSORLG00000014516	Cytochrome P450, family 26, subfamily A, polypeptide 1	cyp26a1	0.027347	1.62393	0.014564	59.3822
ENSORLG00000017546	Homeobox D3	hoxd3a	0.104274	5.63561	0.0109	54.0464
ENSORLG00000029845	Ring finger protein 183	rnf183	0.262979	13.3757	0.00913	50.8622
ENSORLG00000013851	Inward rectifier potassium channel 16	kcnj16	0.06799	3.30012	0.020219	48.5385
ENSORLG00000013016	Calcium homeostasis modulator 1	si:dkeyp-80c12.5	0.152021	7.66807	0.005195	50.4409
ENSORLG00000017026	Homeobox protein XHOX-3	eve1	0.020928	0.961771	0.04911	45.9567
ENSORLG00000017782	Bone morphogenetic protein 3	bmp3	0.131324	6.18132	0.004294	47.0691
ENSORLG00000016368	Heme transporter hrg1-A	slc48a1b	0.151939	6.68449	0.009554	43.9945
ENSORLG00000003376	Zgc:110333	zgc:110333	0.108466	4.42466	0.026771	40.793
ENSORLG00000005954	Arylacetamide deacetylase	aadac	0.337479	13.4183	0.006952	39.7603
ENSORLG00000012948	PR domain zinc finger protein 1-like	prdm1b	0.383341	15.1199	0.004756	39.4425
ENSORLG00000010789	RAB38, member RAS oncogene family	rab38 (1 of many)	0.077988	3.04508	0.006228	39.0453
ENSORLG00000022459	Erythrocyte band 7 integral membrane protein-like	stoml3a	0.020907	0.809671	0.02909	38.7275
ENSORLG00000020050	Microtubule associated protein 1 light chain 3 gamma	map1lc3c	0.864366	33.14	0.008438	38.3403
ENSORLG00000018573	Alpha-1,3-mannosyl-glycoprotein 4-beta-N-acetylglucosaminyltransferase B	mgat4b	0.139553	4.61189	0.01071	33.0475
ENSORLG00000030486	DNA damage inducible transcript 4 like	ddit4l	0.063261	1.93355	0.018655	30.5647
ENSORLG00000023188	Homeobox A7	hoxa7	0.315432	10.3395	0.006283	32.779
ENSORLG00000030640	Claudin b	cldnb	0.811916	24.9452	0.009414	30.7238
ENSORLG00000007148	Interferon-induced very large GTPase 1	si:dkey-202l22.6	0.012856	0.391662	0.042544	30.4657
ENSORLG00000016264	Sodium-dependent phosphate transport protein 2B	slc34a2b	0.82561	24.3179	0.00625	29.4545
ENSORLG00000014498	Transmembrane protein 120A	tmem120a	0.069441	1.98998	0.014869	28.6569
ENSORLG00000017272	Occludin	oclnb	0.055251	1.48354	0.021591	26.8511
ENSORLG00000023807	Sodium-dependent lysophosphatidylcholine symporter 1-B	mfsd2aa (1 of many)	0.04208	1.07196	0.037564	25.4741
ENSORLG00000024136	Mucin-12	si:ch211-168f7.5	0.017507	0.445988	0.037564	25.4741
ENSORLG00000019014	Calpain-1 catalytic subunit-like	zgc:136872 (1 of many)	0.053971	1.33769	0.029973	24.7856
ENSORLG00000011733	Rh family C glycoprotein	rhcgb	0.82595	20.3117	0.008043	24.592
ENSORLG00000001496	Ankyrin repeat domain 29	ankrd29	0.313211	7.49358	0.022472	23.925
ENSORLG00000006603	Carbonic anhydrase 4	ca15b	7.24682	169.952	0.007115	23.4519
*1 Fragment per kilobase of exon length per million reads
*2 Fold increases of anterior intestine compared to posterior intestine in WT

## Sheet: Table S4
Table S4. List of the genes down-regulated by a third-fold in the anterior intestine of IL-17RA1-KO medaka.
Gene_ID	Gene name	Gene Symbol	FPKM*1		p_value	Fold decreases*2
			WT	IL-17RA1-KO
ENSORLG00000008693	Striated muscle preferentially expressed protein kinase	spegb	0.108647	0	0.017363	0
ENSORLG00000008141	Melatonin receptor 1A	mtnr1aa	0.529078	0.0121906	0.020256	0.0230413
ENSORLG00000018249	Wnt family member 6	wnt6b	0.411282	0.0126353	0.040303	0.0307217
ENSORLG00000023466	Interleukin 17C	il17c	1.216	0.0611304	0.015992	0.0502719
ENSORLG00000000705	Osteoprotegerin a	opga	1.22939	0.12797	0.002707	0.104092
ENSORLG00000021993	Pleckstrin homology domain-containing family B member 1	si:ch211-176g13.7	1.32981	0.179046	0.009807	0.134641
ENSORLG00000025607	Lysosomal-associated transmembrane protein 4B	laptm4b	1.30325	0.176778	0.004008	0.135644
ENSORLG00000000922	Tescalcin	tesca	7.98642	1.17154	0.004757	0.146692
ENSORLG00000003196	Squalene epoxidase	sqlea	2.79599	0.449509	0.010949	0.160769
ENSORLG00000026984	Heat shock protein family A (Hsp70) member 2	hspa2	1.84464	0.333101	0.033266	0.180578
ENSORLG00000007442	Homogentisate 1,2-dioxygenase	hgd	1.10326	0.21772	0.011977	0.197342
ENSORLG00000020877	Putative nucleotidyltransferase FAM46A	tent5bb	1.70985	0.356565	0.03044	0.208535
ENSORLG00000016350	Retinoic acid induced 2	rai2	2.83474	0.618148	0.029415	0.218062
ENSORLG00000014220	Potassium inwardly rectifying channel subfamily J member 1	kcnj15	12.5043	2.76003	0.006425	0.220727
ENSORLG00000009143	SPARC (osteonectin), cwcv and kazal like domains proteoglycan 2	spock2	10.3871	2.30002	0.006511	0.221432
ENSORLG00000015759	Ubiquitin-protein ligase E3A	ube3a	1.7653	0.408127	0.029168	0.231194
ENSORLG00000007210	Transmembrane serine protease 13b	tmprss13b	13.1704	3.15771	0.005656	0.239758
ENSORLG00000017727	NADPH oxidase activator 1	noxa1	31.677	7.64383	0.004372	0.241305
ENSORLG00000010369	Vasorin	vasna	2.08176	0.526261	0.041744	0.252796
ENSORLG00000016652	Chemokine (C motif) receptor 1a, duplicate 1	xcr1a.1	4.05316	1.03682	0.04703	0.255805
ENSORLG00000011017	EF-hand calcium binding domain 1	efcab1	2.12098	0.565963	0.026834	0.26684
ENSORLG00000011713	Metallophosphoesterase domain-containing protein 1	mpped1	3.98648	1.06814	0.008908	0.267941
ENSORLG00000020852	ETS translocation variant 5	etv5a	6.82902	1.83902	0.004545	0.269295
ENSORLG00000002190	3 beta-hydroxysteroid dehydrogenase type 7-like	hsd3b7 (1 of many)	27.8564	7.59552	0.005036	0.272667
ENSORLG00000005554	Angiotensinogen	agt	3.37842	0.92132	0.031722	0.272708
ENSORLG00000014917	Protein FAM110C-like	si:ch211-107n13.1	4.48901	1.24987	0.034293	0.278429
ENSORLG00000012993	4-hydroxyphenylpyruvate dioxygenase-like	hpdb	6.43616	1.88563	0.036208	0.292975
ENSORLG00000009351	Mevalonate diphosphate decarboxylase	mvda	8.4053	2.52341	0.010287	0.300217
ENSORLG00000013807	Adhesion G protein-coupled receptor D1	adgrd1	3.32943	1.0018	0.018816	0.300892
ENSORLG00000017883	Clusterin-like protein 1	clul1	6.12056	1.85427	0.027416	0.302959
ENSORLG00000009486	Nuclear receptor ROR-alpha	rorc	2.03897	0.62096	0.044622	0.304546
ENSORLG00000023633	Galactosylgalactosylxylosylprotein 3-beta-glucuronosyltransferase 1-like	b3gat1 (1 of many)	64.1275	19.8888	0.005185	0.310145
ENSORLG00000010025	PR domain containing 1b, with ZNF domain	prdm1b	13.487	4.20608	0.008451	0.311861
ENSORLG00000010075	Glutamate receptor-interacting protein 2	grip2a	5.20205	1.63261	0.011275	0.31384
ENSORLG00000014448	Ribonuclease ZC3H12A	zc3h12a	9.96743	3.1314	0.007713	0.314163
ENSORLG00000003479	Retinol dehydrogenase 7-like	dhrs9 (1 of many)	15.0659	4.76562	0.01387	0.316318
ENSORLG00000013226	Acetyl-CoA acetyltransferase 2	acat2	23.153	7.34271	0.00851	0.317138
ENSORLG00000030080	Growth arrest and DNA damage-inducible protein GADD45 gamma	gadd45ga	7.46246	2.40378	0.012407	0.322116
ENSORLG00000009869	Retinol dehydrogenase 12	rdh12	9.46276	3.12931	0.015325	0.330698
*1 Fragment per kilobase of exon length per million reads
*2 Fold decrease in IL-17RA1-KO intestine compared to WT

## Sheet: Table S5
Table S5. List of the genes down-regulated by a third-fold in the posterior intestine of IL-17RA1-KO medaka.
Gene_ID	Gene name	Gene Symbol	FPKM*1		p_value	Fold decreases*2
			WT	IL-17RA1-KO
ENSORLG00000007148	Interferon-induced very large GTPase 1	si:dkey-202l22.6	0.391662	0.0161159	0.012546	0.0411474
ENSORLG00000028123	Interleukin-17A/F-1	il-17a/f-1	7.41683	0.666882	0.014332	0.0899147
ENSORLG00000003196	Squalene epoxidase	sqlea	0.976978	0.0878447	0.038683	0.0899147
ENSORLG00000009138	Delphilin	grid2ipa	0.285976	0.0299991	0.035329	0.1049
ENSORLG00000012993	4-hydroxyphenylpyruvate dioxygenase-like	hpdb	8.36357	1.03302	0.008361	0.123514
ENSORLG00000026984	Heat shock protein family A (Hsp70) member 2	hspa2	3.27972	0.646331	0.026345	0.197069
ENSORLG00000017883	Clusterin-like protein 1	clul1	7.66645	1.74723	0.018615	0.227906
ENSORLG00000017149	Insulin-like growth factor-binding protein 3	igfbp3 (1 of many)	1.46759	0.345763	0.030308	0.235599
ENSORLG00000018249	Wnt family member 6	wnt6b	2.49538	0.615827	0.036883	0.246787
ENSORLG00000010353	Aldose reductase	akr1b1.1 (1 of many)	19.0861	4.84742	0.01489	0.253976
ENSORLG00000013056	Pappalysin 2	pappa2	0.990598	0.25282	0.042431	0.255219
ENSORLG00000000922	Tescalcin	tesca	5.18189	1.3279	0.046327	0.256257
ENSORLG00000002209	E3 ubiquitin-protein ligase TRIM39	btr01	2.34626	0.655494	0.038833	0.279378
ENSORLG00000014291	Macrophage stimulating 1 receptor	mst1rb	0.783721	0.2204	0.04643	0.281222
ENSORLG00000026741	Uncharacterized protein	gjd3 (1 of many)	21.7949	6.42849	0.024864	0.294954
ENSORLG00000009169	Solute carrier family 26 member 6	si:ch211-117c9.2	3.18438	0.973117	0.044361	0.30559
ENSORLG00000022468	Adrenomedullin	adm	9.73919	2.9799	0.020302	0.30597
ENSORLG00000009979	Ribosomal protein S6 kinase alpha-2-like	rps6ka2	1.6532	0.511758	0.04837	0.309556
ENSORLG00000003493	Solute carrier family 6 member 20	slc6a20	7.74295	2.41885	0.021208	0.312393
ENSORLG00000011469	Cartilage acidic protein 1	aspip	6.66806	2.11226	0.015024	0.316773
ENSORLG00000010295	Circadian-associated transcriptional repressor	ciart	8.1762	2.60737	0.01856	0.318897
ENSORLG00000004437	STEAP3 metalloreductase	steap3	36.8252	12.0299	0.013637	0.326674
*1 Fragment per kilobase of exon length per million reads
*2 Fold decrease in IL-17RA1-KO intestine compared to WT

## Sheet: Table S6
Table S6. List of the genes up-regulated over 3-fold in the anterior intestine of IL-17RA1-KO medaka.
Gene_ID	Gene name	Gene Symbol	FPKM*1		p_value	Fold increases*2
			WT	IL-17RA1-KO
ENSORLG00000012486	Kv channel-interacting protein 2	kcnip2	0	0.998982	0.019288	N/A
ENSORLG00000005999	Glutamate receptor ionotropic, NMDA 2D	grin2da	0	0.146159	0.022245	N/A
ENSORLG00000004952	Uncharacterized LOC101173774	si:ch73-244f7.3	0	0.440188	0.032809	N/A
ENSORLG00000001465	Transmembrane protein 132C	si:dkey-215k6.1	0	0.111615	0.042488	N/A
ENSORLG00000025271	Hemoglobin subunit beta-like	gb	0	1.38225	0.042488	N/A
ENSORLG00000029206	Hyaluronan and proteoglycan link protein 1	hapln1a	0	0.167357	0.042488	N/A
ENSORLG00000019408	Troponin C, slow skeletal and cardiac muscles	tnnc1b	0.0262979	0.98889	0.023186	37.6034
ENSORLG00000015767	Myosin binding protein C, slow type	mybpc1	0.023557	0.633971	0.011789	26.9122
ENSORLG00000013436	Col10a1	col10a1a	0.0638182	1.2046	0.004315	18.8754
ENSORLG00000004262	Olfactory receptor 52A5	or129-1	0.235173	2.98244	0.017554	12.6819
ENSORLG00000004009	Coagulation factor III, tissue factor	f3	0.0511483	0.532691	0.046677	10.4147
ENSORLG00000013108	Papilin	paplnb	0.0533849	0.560905	0.046677	10.5068
ENSORLG00000021813	Anoctamin 9b	ano9 (1 of many)	0.101588	1.03366	0.03503	10.175
ENSORLG00000015485	Gap junction alpha-1 protein	cx43	0.248258	2.0135	0.03924	8.11053
ENSORLG00000024663	Glutamate ionotropic receptor delta type subunit 2	grid2	0.0525581	0.426274	0.03924	8.11053
ENSORLG00000000201	C-X-C motif chemokine ligand 14	cxcl14	0.131372	1.02398	0.044232	7.79453
ENSORLG00000024787	Cadherin-like protein 26	cdh26.1 (1 of many)	0.0581511	0.468251	0.02571	8.05232
ENSORLG00000009208	Glutamate decarboxylase 1	gad1	0.088345	0.651386	0.029295	7.37321
ENSORLG00000002829	Supervillin	svilc	0.119024	0.870421	0.006497	7.31302
ENSORLG00000012050	Solute carrier family 1 member 1	slc1a1	0.625783	4.36236	0.009071	6.97103
ENSORLG00000026564	Hepatic leukemia factor	dbpb	0.430141	2.91337	0.003307	6.77306
ENSORLG00000002168	Myosin light chain, phosphorylatable, fast skeletal muscle	mylpfa	0.212372	1.24399	0.02443	5.8576
ENSORLG00000014422	Collagen type XVIII alpha 1 chain a	col18a1a	0.666097	3.4775	0.005683	5.22071
ENSORLG00000007685	Receptor tyrosine-protein kinase erbB-3	erbb3b	0.104488	0.534757	0.04247	5.11787
ENSORLG00000006791	Pappalysin 1	pappaa	0.153208	0.766962	0.013681	5.00602
ENSORLG00000012951	Protein tyrosine phosphatase domain containing 1	ptpdc1a	0.455295	2.21994	0.007541	4.87583
ENSORLG00000001958	A disintegrin and metalloproteinase with thrombospondin motifs 12	adamts12	0.182611	0.883007	0.038243	4.83545
ENSORLG00000004672	Thrombospondin type 1 domain containing 1	thsd1	0.264997	1.23146	0.018157	4.64706
ENSORLG00000027772	SRY-box transcription factor 7	sox7	0.275673	1.26311	0.030107	4.58192
ENSORLG00000001260	SRY-box containing gene 6a	sox6a	0.17205	0.785689	0.026297	4.56663
ENSORLG00000029754	Endothelial cell adhesion molecule	esama	0.885306	3.83284	0.023182	4.3294
ENSORLG00000000592	Kinase insert domain receptor	kdr	0.634114	2.65175	0.012806	4.18182
ENSORLG00000011365	Adrenoceptor beta 3a	adrb3a	0.995564	4.15962	0.038145	4.17815
ENSORLG00000010575	Leucine-rich repeat-containing protein 17	lrrc17	1.09068	4.52472	0.01014	4.14854
ENSORLG00000000985	Solute carrier organic anion transporter family member 2A1	slco2a1	0.273516	1.11548	0.038112	4.07831
ENSORLG00000009315	Collagen, type IV, alpha 6	col4a6	0.755059	3.02802	0.011845	4.01031
ENSORLG00000006659	BCL6B transcription repressor	bcl6b	1.03244	4.06786	0.043141	3.94006
ENSORLG00000004792	Adhesion G protein-coupled receptor L3	adgrl3.1	0.345889	1.36123	0.013194	3.93545
ENSORLG00000012201	Abnormal spindle microtubule assembly	aspm	0.982363	3.73956	0.004891	3.8067
ENSORLG00000005094	MKL/myocardin-like protein 2	mrtfbb	0.221959	0.838712	0.038645	3.77867
ENSORLG00000006686	1,25-dihydroxyvitamin D(3) 24-hydroxylase, mitochondrial	cyp24a1	0.928276	3.45261	0.034153	3.71937
ENSORLG00000004345	Patched 1	ptch1	0.36144	1.34044	0.020884	3.70861
ENSORLG00000028295	USH1 protein network component harmonin binding protein 1	ushbp1	0.824094	3.04306	0.013577	3.69262
ENSORLG00000005980	Neurogenic locus notch homolog protein 2	notch3	0.534826	1.97568	0.013426	3.69405
ENSORLG00000020628	Ectonucleotide pyrophosphatase/phosphodiesterase 6	enpp6	1.42252	5.27554	0.030875	3.70857
ENSORLG00000017972	Fibroblast growth factor receptor 3	fgfr3	1.02999	3.77934	0.007583	3.6693
ENSORLG00000019688	Stabilin 1	stab1	0.658583	2.40459	0.013358	3.65116
ENSORLG00000029633	Transcription factor SOX-4	sox4a	1.77602	6.37668	0.037961	3.59043
ENSORLG00000017898	Voltage-dependent L-type calcium channel subunit beta-3	cacnb2b	0.48175	1.72758	0.04033	3.58606
ENSORLG00000014800	Growth hormone receptor	ghr	1.80827	6.47163	0.008613	3.57891
ENSORLG00000003448	Protocadherin-16	dchs1a	0.269938	0.963211	0.019485	3.56827
ENSORLG00000014817	Receptor-type tyrosine-protein phosphatase S	ptprsa	0.57885	2.0293	0.015528	3.50575
ENSORLG00000009171	DNA damage inducible transcript 4	ddit4	2.85734	10.0146	0.011561	3.50487
ENSORLG00000000356	Laminin subunit beta 1	lamb1a	0.511119	1.72942	0.027308	3.3836
ENSORLG00000013150	Pleckstrin homology and RhoGEF domain containing G1	plekhg1	0.308997	1.04458	0.04009	3.38055
ENSORLG00000016809	Lysyl oxidase homolog 2A	loxl2a	0.644825	2.17297	0.028498	3.36987
ENSORLG00000025181	Tumor necrosis factor alpha-induced protein 2	exoc3l2a	0.787799	2.64599	0.012983	3.35871
ENSORLG00000000843	Scavenger receptor class F member 2	scarf2	0.893455	2.98639	0.036108	3.34252
ENSORLG00000020389	Teneurin-3	si:dkey-237h12.3	0.277934	0.92705	0.034366	3.3355
ENSORLG00000007888	FYVE, RhoGEF and PH domain-containing protein 5	fgd5a	0.6159	2.05285	0.029021	3.33309
ENSORLG00000006672	Rho GTPase activating protein 31	arhgap31	0.788262	2.61211	0.023931	3.31375
ENSORLG00000001968	Collagen alpha-1(VIII) chain	col8a1 (1 of many)	1.01367	3.33659	0.041584	3.29161
ENSORLG00000003427	Dysferlin, limb girdle muscular dystrophy 2B (autosomal recessive)	dysf	1.036	3.40982	0.022246	3.29134
ENSORLG00000011369	Secreted protein acidic and cysteine rich	sparc	18.6594	60.7353	0.00588	3.25495
ENSORLG00000011277	ANTXR cell adhesion molecule 1	antxr1a	0.948401	3.06265	0.030142	3.22928
ENSORLG00000013548	Fli-1 proto-oncogene, ETS transcription factor	fli1a	0.567467	1.82143	0.026009	3.20975
ENSORLG00000000636	Notch receptor 1	notch1b	0.531969	1.69192	0.020964	3.18048
ENSORLG00000024518	Ephrin A5	efna5	0.976014	3.08986	0.020038	3.1658
ENSORLG00000023423	NACHT and WD repeat domain containing 2	nwd2	0.372634	1.17227	0.02908	3.1459
ENSORLG00000004966	ADAM metallopeptidase with thrombospondin type 1 motif 5	adamts5	0.479928	1.50391	0.030278	3.13361
ENSORLG00000002317	Potassium voltage-gated channel subfamily H member 6	kcnh6a	0.67998	2.12518	0.041359	3.12536
ENSORLG00000020663	FRAS1 related extracellular matrix 1	frem1a	0.488789	1.52583	0.035581	3.12164
ENSORLG00000020551	FAT atypical cadherin 4	fat4	0.63047	1.9655	0.013035	3.11752
ENSORLG00000012356	Platelet endothelial cell adhesion molecule	pecam1	1.58874	4.9318	0.019974	3.10423
ENSORLG00000030619	Neuron derived neurotrophic factor	ndnf	0.437523	1.34993	0.044989	3.0854
ENSORLG00000001940	Vascular endothelial growth factor receptor kdr-like	kdrl	1.4474	4.43023	0.01281	3.06081
ENSORLG00000023445	Dishevelled binding antagonist of beta catenin 2	dact2	1.6232	4.9692	0.023288	3.06136
ENSORLG00000024534	SH3 and multiple ankyrin repeat domains protein 3-like	shank3b	0.598911	1.83501	0.020886	3.06392
ENSORLG00000017886	Collectin-12	colec12	2.48525	7.50917	0.016693	3.0215
ENSORLG00000008238	Guanidinoacetate N-methyltransferase	gamt	155.891	468.972	0.006186	3.00833
*1 Fragment per kilobase of exon length per million reads
*2 Fold increase in IL-17RA1-KO intestine compared to WT

## Sheet: Table S7
Table S7. List of the genes up-regulated over 3-fold in the posterior intestine of IL-17RA1-KO medaka.
Gene_ID	Gene name	Gene Symbol	FPKM*1		p_value	Fold increases*2
			WT	IL-17RA1-KO
ENSORLG00000015892	Alpha-1-antitrypsin homolog	serpina1l	0	67.8485	0.032797	N/A
ENSORLG00000013444	ADAM metallopeptidase with thrombospondin type 1 motif 13	adamts13	0	0.113279	0.033191	N/A
ENSORLG00000030151	Aconitate decarboxylase 1	acod1	0	0.163029	0.040635	N/A
ENSORLG00000021992	MORN repeat containing 2	morn2	0	0.278074	0.046975	N/A
ENSORLG00000011267	Complement component C3-1	c3-1	0.0384109	150.681	0.026869	3922.86
ENSORLG00000003245	Uncharacterized LOC101168896	si:ch211-165i18.2	0.00946154	17.4647	0.043325	1845.86
ENSORLG00000010251	Hemopexin	hpx	0.0580799	103.353	0.035007	1779.5
ENSORLG00000012653	Apolipoprotein B-100-like	apobb.2	0.0136335	11.8376	0.046451	868.275
ENSORLG00000005801	Complement factor B	bf/c2	0.027068	22.66	0.047184	837.151
ENSORLG00000018755	GTP cyclohydrolase 1	gch2	0.0276279	1.25201	0.025248	45.317
ENSORLG00000002868	Thyroid hormone responsive	thrsp	0.210134	7.05694	0.013574	33.5831
ENSORLG00000030238	GRAM domain containing 2B	gramd2b	0.118416	3.09838	0.012117	26.1652
ENSORLG00000009323	Proteoglycan 4	prg4b	0.0815995	1.91495	0.006639	23.4677
ENSORLG00000006084	Vitellogenin 1	ol-vit1	0.0447951	1.04316	0.005936	23.2874
ENSORLG00000004075	Histidine ammonia-lyase	hal	0.0653043	1.374	0.01298	21.04
ENSORLG00000011150	Citrate lyase beta like	clybl	0.0269722	0.512929	0.049137	19.017
ENSORLG00000016001	Si:dkey-85n7.8	si:dkey-85n7.8	0.95961	12.2694	0.03231	12.7859
ENSORLG00000016020	Serpin family A member 10	si:ch1073-416d2.3 (1 of many)	0.186131	2.36694	0.028633	12.7165
ENSORLG00000010477	Angiopoietin like 3	angptl3	0.050115	0.581284	0.031793	11.599
ENSORLG00000002247	Serpin family D member 1	serpind1	0.341363	3.77531	0.013787	11.0595
ENSORLG00000011239	Nucleoside diphosphate kinase, mitochondrial	nme4	0.361662	3.92176	0.01865	10.8437
ENSORLG00000008088	Vitronectin	vtna	0.15331	1.65418	0.037954	10.7898
ENSORLG00000022248	Uncharacterized LOC101165397	si:ch211-256m1.8	0.2102	2.09298	0.008012	9.95707
ENSORLG00000013040	PDZ domain containing ring finger 4	pdzrn4	0.0582235	0.573249	0.047262	9.84566
ENSORLG00000018731	Glucose-6-phosphatase	g6pca.1	0.298067	2.56281	0.045345	8.59809
ENSORLG00000016737	Uridine phosphorylase 2	upp2	0.72121	5.98217	0.009182	8.29463
ENSORLG00000017079	ATP binding cassette subfamily B member 11	abcb11a	0.12791	0.966083	0.028841	7.55283
ENSORLG00000024787	Cadherin-like protein 26	cdh26.1 (1 of many)	0.16436	1.20984	0.016037	7.3609
ENSORLG00000017559	Iodothyronine deiodinase 3	dio3	0.974903	6.63623	0.032689	6.80707
ENSORLG00000015968	Von Willebrand factor A domain containing 5B1	vwa5b1	0.114326	0.740128	0.029253	6.47386
ENSORLG00000006450	Sex hormone binding globulin	shbg	2.62057	16.2276	0.009985	6.19238
ENSORLG00000026149	Pentraxin 3	ptx3b	0.265016	1.47211	0.025609	5.5548
ENSORLG00000000795	SEC14-like protein 2	sec14l7	1.01148	5.57225	0.035706	5.509
ENSORLG00000028914	Retinol-binding protein 2	rbp2b	0.449704	2.46524	0.032809	5.48192
ENSORLG00000025673	Protein FAM131A	fam131a	0.838016	4.49972	0.012609	5.36949
ENSORLG00000011365	Adrenoceptor beta 3a	adrb3a	0.856795	4.40968	0.044702	5.14672
ENSORLG00000008872	Aquaporin-7	aqp7	0.818037	4.17249	0.034336	5.10061
ENSORLG00000016809	Lysyl oxidase homolog 2A	loxl2a	0.478346	2.37189	0.024202	4.95853
ENSORLG00000025647	Alkaline phosphatase	alpi.1	0.565984	2.76079	0.024064	4.87787
ENSORLG00000013399	Venom prothrombin activator oscutarin-C non-catalytic subunit	f5	0.760138	3.69612	0.013448	4.86243
ENSORLG00000024658	Rho guanine nucleotide exchange factor 19	arhgef19	1.6574	8.05775	0.012502	4.86167
ENSORLG00000025559	Retinoic acid induced 1	rai1	0.336487	1.63377	0.024487	4.85539
ENSORLG00000009228	Dopamine receptor D3	drd3	0.323655	1.50255	0.038692	4.64244
ENSORLG00000010575	Leucine-rich repeat-containing protein 17	lrrc17	1.51994	7.05042	0.015635	4.63863
ENSORLG00000025575	Suppressor of cytokine signaling 8	socs8	0.390425	1.72476	0.032654	4.41764
ENSORLG00000002277	Uncharacterized LOC101171752	kcnk4a	1.29955	5.73944	0.017366	4.41649
ENSORLG00000020391	Radical S-adenosyl methionine domain containing 2	rsad2	4.60375	19.5343	0.011856	4.24314
ENSORLG00000007987	Cholesterol 25-hydroxylase-like protein 1, member 1	ch25hl1.1	7.27446	30.6026	0.017842	4.20686
ENSORLG00000017352	Quiescin sulfhydryl oxidase 1	qsox1	1.29885	5.45695	0.028566	4.20136
ENSORLG00000013447	Serpin family F member 1	serpinf1	0.541354	2.27191	0.045561	4.19672
ENSORLG00000003719	Monocarboxylate transporter 7	slc16a6a	0.412357	1.73055	0.045561	4.19672
ENSORLG00000027036	Nicotinate-nucleotide pyrophosphorylase	qprt	0.544889	2.25559	0.039821	4.13953
ENSORLG00000005461	Inhibin beta B chain	inhbc	0.942162	3.85979	0.044071	4.09674
ENSORLG00000017972	Fibroblast growth factor receptor 3	fgfr3	1.04929	4.27127	0.016968	4.07062
ENSORLG00000009477	Alkaline phosphatase	alp3	1.30591	5.28095	0.02142	4.0439
ENSORLG00000005696	F-box protein 32	fbxo32	2.34743	9.46156	0.017456	4.0306
ENSORLG00000006686	1,25-dihydroxyvitamin D(3) 24-hydroxylase, mitochondrial	cyp24a1	2.23688	8.9301	0.025158	3.99221
ENSORLG00000004646	Ribosomal modification protein rimK like family member B	rimkla	0.419021	1.63545	0.030058	3.90302
ENSORLG00000028594	Peptide Y	pyyb	2.87063	11.1504	0.037076	3.88431
ENSORLG00000023476	Stanniocalcin 2	stc2a	0.909373	3.47314	0.028258	3.81927
ENSORLG00000012173	Pyruvate dehydrogenase (acetyl-transferring) kinase isozyme 2, mitochondrial	pdk2a	7.38839	27.8275	0.014819	3.76638
ENSORLG00000001050	Nitric oxide synthase 1	nos1	0.64744	2.42041	0.025035	3.73842
ENSORLG00000018068	Egl-9 family hypoxia inducible factor 3	egln3	13.4838	50.23	0.019329	3.7252
ENSORLG00000009416	Collagen type IV alpha 5 chain	col4a5	0.984552	3.62513	0.033003	3.68201
ENSORLG00000009315	Collagen, type IV, alpha 6	col4a6	0.656153	2.40095	0.044613	3.65914
ENSORLG00000015839	Semaphorin-6D	sema6e	0.358699	1.29991	0.045782	3.62396
ENSORLG00000011397	Myomesin 1	myom1b	0.71802	2.51041	0.046256	3.4963
ENSORLG00000015744	Apolipoprotein A-I	apoa1b	1319.02	4603.74	0.013515	3.49027
ENSORLG00000015770	Beta-ureidopropionase 1	upb1	5.20878	18.1295	0.022013	3.48057
ENSORLG00000002940	UTP--glucose-1-phosphate uridylyltransferase	ugp2a	3.29746	11.364	0.024609	3.44627
ENSORLG00000029803	Solute carrier family 13 member 5	slc13a5b	5.52097	19.0101	0.017319	3.44325
ENSORLG00000003339	Transcription regulator protein BACH1	bach1a	0.97311	3.32392	0.044855	3.41576
ENSORLG00000005019	Large neutral amino acids transporter small subunit 4	slc43a2b	18.446	62.8786	0.015417	3.4088
ENSORLG00000004048	Amine oxidase copper containing 1	aoc1	12.2209	41.399	0.016561	3.38756
ENSORLG00000025379	TSC22 domain family protein 3	si:ch211-220e11.3	16.2102	53.9343	0.017383	3.32718
ENSORLG00000006281	Phosphoenolpyruvate carboxykinase 2, mitochondrial	pck2	28.6519	93.2889	0.017698	3.25594
ENSORLG00000014358	Meprin A subunit beta	mep1b	27.3325	88.8762	0.017158	3.25167
ENSORLG00000007656	Beta,beta-carotene 9,,10,-oxygenase	bco2a	4.17077	13.5191	0.033402	3.2414
ENSORLG00000024341	Eukaryotic translation initiation factor 4E binding protein 3	eif4ebp3l	9.61898	30.8027	0.021794	3.20228
ENSORLG00000026564	Hepatic leukemia factor	dbpb	1.67358	5.35873	0.036852	3.20196
ENSORLG00000027016	Arachidonate 5-lipoxygenase activating protein	alox5ap	2.8509	9.08188	0.036294	3.18562
ENSORLG00000001512	Beta,beta-carotene 15,15,-dioxygenase	bco1l	5.93553	18.8732	0.025429	3.17971
ENSORLG00000007741	Glutamic-oxaloacetic transaminase 1	got1	5.55834	17.4723	0.030007	3.14344
ENSORLG00000024518	Ephrin A5	efna5	1.11996	3.5087	0.042918	3.13288
ENSORLG00000001185	Solute carrier family 22 member 5	slc22a5	7.76808	23.6478	0.025397	3.04422
*1 Fragment per kilobase of exon length per million reads
*2 Fold increase in IL-17RA1-KO intestine compared to WT
